# Supplementary material for: Gamify4LexAmb: a gamification-based approach to address lexical ambiguity in natural language requirements
Source: PeerJ journal article supplement (doi:10.7717/peerj-cs.2229), 2024-09-19
Supplement: Appendix.pdf [file Appendix.pdf]

## APPENDIX A

| No.                                      | Checklist Elements                                                     | Assessment<br>Y/N |
|------------------------------------------|------------------------------------------------------------------------|-------------------|
| <b>User Requirements</b>                 |                                                                        |                   |
| 1.                                       | Does framework capture user requirements from the user?                |                   |
| 2.                                       | Does framework show user roles while providing requirements?           |                   |
| <b>Gamification</b>                      |                                                                        |                   |
| 3.                                       | Is gamification exhibited in the framework?                            |                   |
| 4.                                       | Does selection of game elements justify according to user roles?       |                   |
| 5.                                       | Does game rules properly define?                                       |                   |
| 6.                                       | Does game rules incorporate the rewarding game elements (e.g., points) |                   |
| <b>Ambiguity Detection and Reduction</b> |                                                                        |                   |
| 7.                                       | Does POS tags suitable technique for ambiguity detection?              |                   |
| 8.                                       | Is dictionary of words well-maintained?                                |                   |
| 9.                                       | Does ambiguity rules comply with POS tags?                             |                   |
| 10.                                      | Do you think user engagement during elicitation can reduce ambiguity?  |                   |
| <b>Flow and Connectivity</b>             |                                                                        |                   |
| 11.                                      | Do you think framework will produce the expected outcome?              |                   |
| 12.                                      | Is mapping of the outcome possible on objective of the study?          |                   |
| <b>Any other Comments:</b>               |                                                                        |                   |
|                                          |                                                                        |                   |

## APPENDIX B

Test Project

**Actual Requirement Description**

Admin and accountant shall be able to generate bank vouchers

validate rule1
validate rule2

**accountant**

registered prof

**Updated Requirement Description**

Admin and registered professional accountant shall be able to generate bank vouchers

Figure: Test NL Requirement again rules P1 and P2
